# Supplementary material
Source: publisher site journal article supplement (https://www.dovepress.com/get_supplementary_file.php?f=327621.docx)
Supplement: Supplementary file 1 [file get_supplementary_file.php]

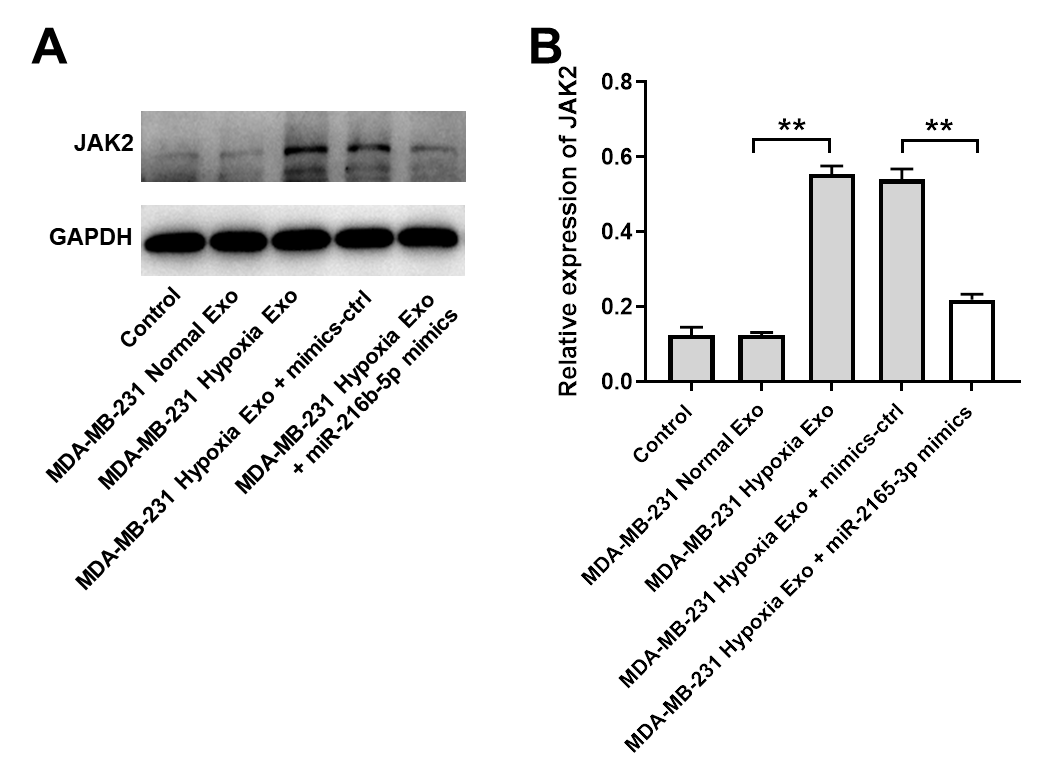


**Supplementary Figure 1 Exosomes derived from hypoxic breast cancer cells** **upregulates JAK2 expression in HUVECs. (A, B)** HUVECs were treated with indicated exosomes, exosomes + si-SNHG1-3, exosomes + mimics-ctrl or exosomes + miR-216b-5p mimics. Western blot analysis of JAK2 expression in HUVECs. **P<0.01; n = 3.
